# Supplementary material
Source: PubMed Central journal article supplement (PMC7483799)
Supplement: NIHMS1609127-supplement-Supplementary_Figure_1.pdf [file NIHMS1609127-supplement-Supplementary_Figure_1.pdf]

**A**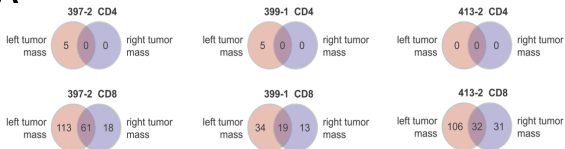**B**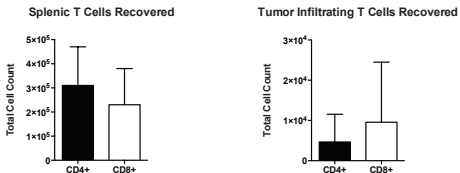

**Supplementary Figure 1. FACS separation of CD4+ and CD8+ T cell subpopulations before sequencing and insertion site analysis.** **A**, Tumors and spleens from SB-mutagenized B16F0 tumor-bearing mice (n=12) were harvested and prepared for fluorescence-activated cell sorting. CD90.2+/CD4+ or CD90.2+/CD8+ cells were collected separately and frozen for subsequent DNA isolation and sequence-based analysis. Few clonal insertion sites were identified in the CD4+ population. However, a number of clonally-expanded insertions in CD8+ T cells were observed in both left and right tumors, but not in the spleen, suggesting the CD8+ subpopulation contributed the majority of detected insertions in this small cohort. **B**, Splenic and tumor-infiltrating T cells by subtype. Both tissues processed via FACS live sorting yielded relatively few cells for analysis. Bars represent population mean and error bars represent standard deviation.
