# Supplementary material
Source: PubMed Central journal article supplement (PMC7483799)
Supplement: NIHMS1609127-supplement-Supplementary_Figure_2.pdf [file NIHMS1609127-supplement-Supplementary_Figure_2.pdf]

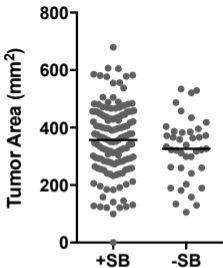

**Supplementary Figure 2. B16F0 tumor size at endpoint.** Tumors were allowed to grow untreated for 21 days before harvesting materials for sequence analysis. Mice with SB-mutagenized T cells (+SB) had similar size tumors at endpoint as mice without SB-mutagenized T cells (-SB). Lines represent
