# Supplementary material
Source: PubMed Central journal article supplement (PMC7483799)
Supplement: NIHMS1609127-supplement-Supplementary_Figure_3.pdf [file NIHMS1609127-supplement-Supplementary_Figure_3.pdf]

### Tumor Area at Endpoint

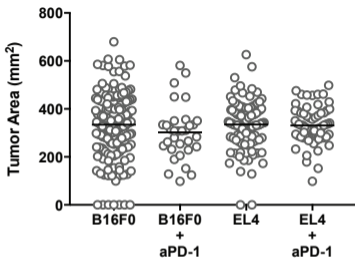

**Supplementary Figure 3. Tumor sizes at endpoint by treatment group.** Tumors were allowed to grow untreated for 21 days (B16F0) or 16 days (EL4) in SB-mutagenized mice before harvesting materials for sequence analysis. Anti-PD-1 treatment did not impact tumor size at endpoint. Lines represent population mean.
