# Supplementary material
Source: PubMed Central journal article supplement (PMC7483799)
Supplement: NIHMS1609127-supplement-Supplementary_Figure_4.pdf [file NIHMS1609127-supplement-Supplementary_Figure_4.pdf]

A

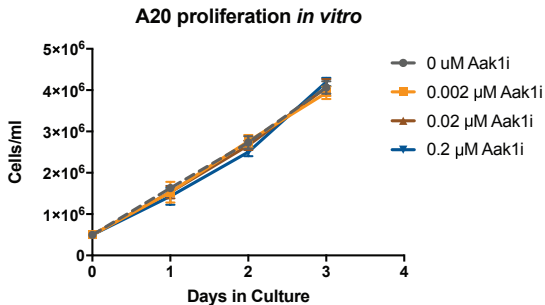

B

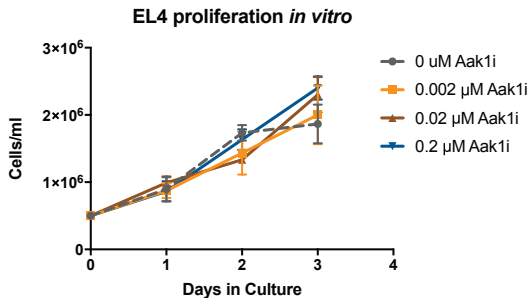

**Supplementary Figure 4. Proliferation of tumor cell lines *in vitro* is not affected by Aak1 inhibitor treatment.** **A**, A20 B cell lymphoma and **B**, EL4 T cell lymphoma cells were grown in suspension under normal growth conditions and treated daily with Aak1 inhibitor as indicated. Cell counts were recorded. Error bars represent standard deviation for technical replicates ( $n = 4$ ) and experiments were repeated twice.
